# Supplementary material for: Signal amplification by adsorption-induced catalytic reduction of dissolved oxygen on nitrogen-doped carbon nanotubes for electrochemiluminescent immunoassay
Source: Royal Society of Chemistry journal article supplement (doi:10.1039/c1cc15766c), 2011-01-01
Supplement: c1cc15766c.pdf [file c1cc15766c.pdf]

1 Electronic Supplementary Information (ESI) for Chemical Communications

2 This journal is (c) The Royal Society of Chemistry 2011

3 Signal Amplification by Adsorption-Induced  
4 Catalytic Reduction of Dissolved Oxygen on  
5 Nitrogen-Doped Carbon Nanotubes for  
6 Electrochemiluminescent Immunoassay

7 Shengyuan Deng,<sup>a</sup> Zhentao Hou,<sup>a</sup> Jianping Lei,<sup>a</sup> Dajie Lin,<sup>a</sup> Zheng Hu,<sup>b</sup> Fen Yan,<sup>c</sup>  
8 and Huangxian Ju<sup>a,\*</sup>

9 <sup>a</sup> State Key Laboratory of Analytical Chemistry for Life Science and <sup>b</sup> Key Laboratory  
10 of Mesoscopic Chemistry (Ministry of Education of China), Department of Chemistry,  
11 Nanjing University, Nanjing 210093, and <sup>c</sup> Jiangsu Institute of Cancer Prevention and  
12 Cure, Nanjing 210009, P.R. China

13 **Experimental**

14 **Materials and Reagents.** Nitrogen-doped carbon nanotubes (NCNTs) were synthesized  
15 according to the chemical vapor deposition (CVD) method reported previously, and were  
16 refluxed in 6 M NaOH at 110 °C for 4 h to remove the Al<sub>2</sub>O<sub>3</sub> support, followed by refluxing in 1  
17 M H<sub>2</sub>SO<sub>4</sub> for 8 h to remove residual Fe catalysts.<sup>S1</sup> The purified NCNTs were thoroughly washed  
18 with deionized water until the pH value of the filtrate reached 7, and then dried at 70 °C  
19 overnight. Carbon nanotubes (CNTs, CVD method, purity ≈98%, multi-walled, diameter 40-100  
20 nm and length 1-2 μm) were purchased from Shenzhen Nanotech Port Co. Ltd (Shenzhen,  
21 China). Carcinoembryonic antigen (CEA) standard solution (1.0 mg mL<sup>-1</sup>) was supplied by  
22 Shanghai Linc-Bio Science Co., Ltd. (Shanghai, China). Mouse monoclonal capture (Ab<sub>1</sub>) and

1 signal (Ab<sub>2</sub>) anti-CEA antibodies (clone No. 27D6 and 28E4) were purchased from Shuangliu  
2 Zhenglong Biochem. Lab (Chengdu, China). Bovine serum albumin (BSA), chitosan (≈85%,  
3 from crab shell, deacetylation), mercaptopropionic acid (MPA), poly(sodium 4-styrenesulfonate)  
4 (PSS, average Mw~70000) and thioacetamide were obtained from Sigma-Aldrich Chemical Co.  
5 (St. Louis, MO). Cadmium chloride (CdCl<sub>2</sub>·2.5H<sub>2</sub>O) was purchased from Alfa Aesar China Ltd.  
6 The clinical serum samples were from Jiangsu Institute of Cancer Research. 0.1 M phosphate  
7 buffered salines (PBS) of various pHs were prepared by mixing the stock solutions of 0.1 M  
8 NaH<sub>2</sub>PO<sub>4</sub> and Na<sub>2</sub>HPO<sub>4</sub> containing 0.1 M KNO<sub>3</sub>. The washing buffer was 0.05% (w/v) Tween-  
9 20 (PBST) in 0.01 M pH 7.4 PBS. The blocking solution was 0.01 M pH 7.4 PBS containing 5%  
10 (w/v) BSA and 0.05% Tween-20. All other reagents were of analytical grade and used as  
11 received. All aqueous solutions were prepared with ultrapure water from a Millipore water  
12 purification system (18 MΩ, Milli-Q, Millipore). The O<sub>2</sub> or N<sub>2</sub>-saturated solution was prepared  
13 by bubbling highly pure O<sub>2</sub> or N<sub>2</sub> into the solution for 30 min.

14 **Apparatus.** X-ray photoelectron spectral (XPS) experiments were operated on an ESCALAB  
15 250 spectrometer (Thermo-VG Scientific Co., U.S.A.) with an ultrahigh vacuum generator.  
16 Attenuated total reflection Fourier transformation infrared (ATR-FTIR) spectra were recorded on  
17 a Vector 22 Fourier transform infrared spectrometer (Bruker Optics, Germany). The UV-vis  
18 absorption spectra were obtained with a UV-3600 UV-vis-NIR spectrophotometer (Shimadzu  
19 Co., Kyoto, Japan). Photoluminescence (PL) spectra were obtained on a RF-5301 PC  
20 fluorometer (Shimadzu Co., Japan). Tapping mode atomic force microscopic (AFM) images  
21 were acquired under ambient conditions by directly casting sample dispersions onto mica sheets  
22 using an Agilent 5500 AFM/SPM system (U.S.A.) with Picoscan v5.3.3 software. After coated  
23 with Au film to improve the conductivity, the morphologies of sample films were examined

1 under an S-4800 scanning electron microscope (SEM, Hitachi, Japan) and a JEM-2100  
2 transmission electron microscope (TEM, Hitachi, Japan). Electrochemical impedance  
3 spectroscopic (EIS) measurements were carried out on a PGSTAT30/FRA2 system (Autolab, the  
4 Netherlands) in 0.1 M KCl containing 5 mM  $K_3Fe(CN)_6/K_4Fe(CN)_6$ . The impedance spectra  
5 were recorded in the frequency range of  $10^{-1}$ - $10^5$  Hz with the amplitude of 5 mV. Cyclic  
6 voltammetric (CV) experiments were performed on a CHI 812B electrochemical workstation  
7 (CH Instruments Inc., USA), and electrochemiluminescent (ECL) measurements were carried  
8 out on a MPI-E multifunctional electrochemical and chemiluminescent analytical system (Xi'an,  
9 China), with a modified glassy carbon electrode (GCE, 5 mm in diameter, China) as working, a  
10 platinum wire as counter and a Ag/AgCl (saturated KCl) as reference electrodes. The ECL  
11 emission window was placed in front of the photomultiplier tube (PMT, detection range from  
12 300 to 650 nm) biased at  $-500$  V. Unless specially stated, the scan rate was  $100$  mV  $s^{-1}$ .

13 **Preparation of PSS-functionalized NCNT (PNCNT) labeled Ab<sub>2</sub>.** PNCNTs were prepared by  
14 sonicating 0.01 mg pristine NCNTs in 200  $\mu$ L of 0.5 M NaCl solution containing 0.5% (w/v)  
15 PSS for 30 min to form a homogenous dispersion followed by centrifugation thrice at 12000 rpm  
16 at 4 °C for 20 min and washing with water to remove the supernatant. The as-prepared PNCNTs  
17 were redispersed in 200  $\mu$ L of 0.01 M pH 6.0 PBS containing 150  $\mu$ g  $mL^{-1}$  Ab<sub>2</sub>. The mixture was  
18 allowed to vortex thrice for 5 min every time at an interval of 30min and overnight at 4 °C. After  
19 shake for 1 h at room temperature, the mixture was centrifugated twice at 6000 rpm at 4 °C for  
20 10 min and washed with PBST to obtained Ab<sub>2</sub>-PNCNTs, which was redispersed in 100  $\mu$ L of  
21 0.01 M pH 6.0 PBS for immunoassay. PCNT and Ab<sub>2</sub>-PCNTs were prepared following the same  
22 procedures.

1 **Preparation of quantum dots (QDs).** The water-soluble CdS QDs with MPA as stabilizing  
2 agent (MPA-CdS QDs) were prepared according to the reported method.<sup>S2</sup> Briefly, 86  $\mu\text{L}$  of  
3 MPA was added to 20 mL of 20 mM  $\text{CdCl}_2$  solution, which was then adjusted to pH 10 with 1 M  
4 NaOH. 20 mL of 20 mM thioacetamide solution was added with extensive stirring in air for 30  
5 min. After refluxing at 80 °C for 10 h, the formed CdS QDs solution was dialyzed exhaustively  
6 for over one week at 4 °C. Finally, the product was concentrated by ultrafiltration at 10000 rpm  
7 at 4 °C for 10 min and diluted with water into a concentration of 14.1  $\mu\text{M}$ . The obtained QDs  
8 solution was kept at 4 °C prior to use.

9 **Preparation of ECL immunosensor and measurement procedure.** A glassy carbon electrode  
10 (GCE) was polished to a mirror using 1.0 and 0.05  $\mu\text{m}$  alumina slurry (Beuhler) followed by  
11 sonication in ethanol and water. After the electrode was rinsed with water and allowed to dry, 20  
12  $\mu\text{L}$  of 10  $\mu\text{M}$  MPA-CdS QDs was dropped on its surface. After dried in air, 10  $\mu\text{L}$  of 0.025%  
13 chitosan solution was coated on the QD film for covalent binding of CEA by activating the  
14 chitosan film with 15  $\mu\text{L}$  of 2% glutaraldehyde in 0.1 M pH 7.4 PBS for 2 h and incubating 20  
15  $\mu\text{L}$  of  $\text{Ab}_1$  (50  $\mu\text{g mL}^{-1}$  in 0.01 M pH 7.4 PBS) for 60 min at 37 °C and overnight at 4 °C. The  
16 resulting surface was slowly washed with streams of PBST and PBS to remove the physically  
17 absorbed  $\text{Ab}_1$ , and blocked with 20  $\mu\text{L}$  of 5% BSA solution for 1 h at room temperature to block  
18 possible remaining active sites against non-specific adsorption, and then washed with PBST and  
19 PBS again to form the ECL immunosensor, which was named as GCE/QDs/chitosan- $\text{Ab}_1$ .

20 To carry out the immunoreaction and ECL measurement, the immunosensor was firstly  
21 incubated with 20  $\mu\text{L}$  of CEA standard solution or serum sample for 30 min at 37 °C. After  
22 washing with PBST and PBS, it was further incubated with 20  $\mu\text{L}$  of  $\text{Ab}_2$ -PNCNTs for 60 min at  
23 37 °C, followed by washing with PBST and PBS. Finally, the ECL signal was detected in 0.1 M

1 pH 8.0 PBS containing 0.1 M KNO<sub>3</sub>. The reference levels of CEA in the human serum samples  
2 were detected with an automation electrochemiluminescent analyzer (Elecsys 2010, Roche).

### 3 **Characterization of CdS QDs**

4 The UV-vis spectrum of the as-prepared CdS QDs showed an absorption inflection point at  
5 371 nm (Fig. S1, curve a), from which the size and concentration of CdS QDs could be estimated  
6 to be 3.5 nm and 4.2 μM with Peng's empirical equations, respectively.<sup>S3</sup> The PL spectrum  
7 (excited at 365 nm) of CdS QDs solution showed a strong emission peak with a maximum  
8 intensity at 560 nm (Fig. S1, curve b). The similar PL excited wavelength and absorption  
9 wavelength indicated the emitter was contributed to the excited state of QD core (QD\*).

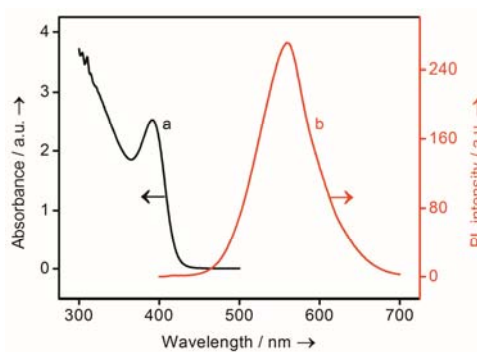

10

11 **Fig. S1.** UV-vis (a) and PL (b) spectra of MPA-CdS QDs.

### 12 **Characterization of PSS-functionalized NCNT labeled Ab<sub>2</sub>**

13 The nitrogen covalently dopes in two forms of pyridinic N (401.8 eV) and graphitic N (400.0  
14 eV) with an N/C atomic ratio of 6.30% calculated from the XPS (Fig. S2A). After  
15 functionalizing NCNTs with PSS by the wrapping method, the NCNTs could well disperse in  
16 water. PNCNTs could be validated by the presence of S at the content of 1.63% from the XPS  
17 curve (Fig. S2C) and the peaks at 1282 cm<sup>-1</sup>, 1233 cm<sup>-1</sup>, and 1159 cm<sup>-1</sup> (two ν<sub>S-O</sub> and one ν<sub>S-</sub>  
18 phenyl) corresponding to sulfonic acid group in the ATR-FTIR spectra (Fig. S2D), in which the

1 peaks at  $1033\text{ cm}^{-1}$  ( $\nu_{\text{C-H}}$  in-plane bending) and  $973\text{ cm}^{-1}$  (out-of-plane hydrogen wagging) were  
2 the characteristic vibrations of a p-substituted phenyl group.<sup>S4</sup> The electron-withdrawing of N-  
3 dopants, resulting in net positive charge on the adjacent C atoms in the graphene plane,  
4 facilitated the functionalization of negatively-charged PSS by wrapping around the pristine  
5 NCNTs.<sup>S5</sup> The XPS survey scan of Ab<sub>2</sub>-PNCNTs displayed an increasing N content up to 13.0%,  
6 while the XPS spectrum of distinct N1s peaks exhibited a N ratio of pyridinic (402.1  
7 eV)/graphitic (400.5 eV) below one (Fig. S2B), showing a growing relative abundance of N in  
8 amino groups of protein. The ATR-FTIR spectra of PNCNTs and Ab<sub>2</sub>-PNCNTs also confirmed  
9 the successful labeling of PNCNTs to Ab<sub>2</sub> (Fig. S2D). PNCNTs did not display obvious peak,  
10 while Ab<sub>2</sub>-PNCNTs showed the vibration of amide I and amide II of protein around 1650 and  
11  $1539\text{ cm}^{-1}$  and the broad coupling of O-H at  $3279\text{ cm}^{-1}$ .

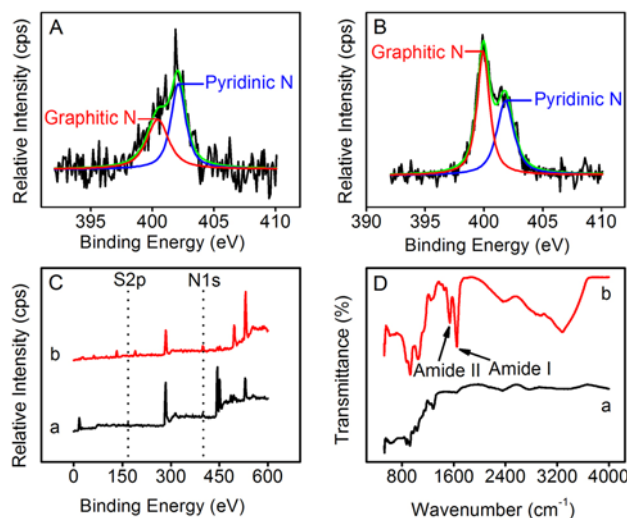

12  
13 **Fig. S2** XPS N1s spectra of (A) PNCNTs and (B) Ab<sub>2</sub>-PNCNTs. (C) XPS survey scan of  
14 PNCNTs (a) and Ab<sub>2</sub>-PNCNTs (b). (D) ATR-FTIR spectra of PNCNTs (a) and Ab<sub>2</sub>-PNCNTs (b).

15 SEM and TEM images were also used to display the morphology change during the  
16 functionalization of PNCNTs. NCNTs showed defective bamboo-like structure with distinctive  
17 compartment layers and a diameter distribution of 40-60 nm (Fig. S3A). The doping of carbon

1 nanotubes with nitrogen can improve the biophilicity of carbon nanomaterials<sup>S6</sup> and is beneficial  
2 to the coverage of proteins in correct conformation.<sup>S7</sup> After PNCNTs were further labeled to Ab<sub>2</sub>,  
3 the formed Ab<sub>2</sub>-PNCNTs showed a rough surface due to the adsorption of protein along the  
4 sidewall (Fig. S3C), which led to a larger tube diameter than PNCNTs (Fig. S3B).

### 5 **Characterization of the immunosensor**

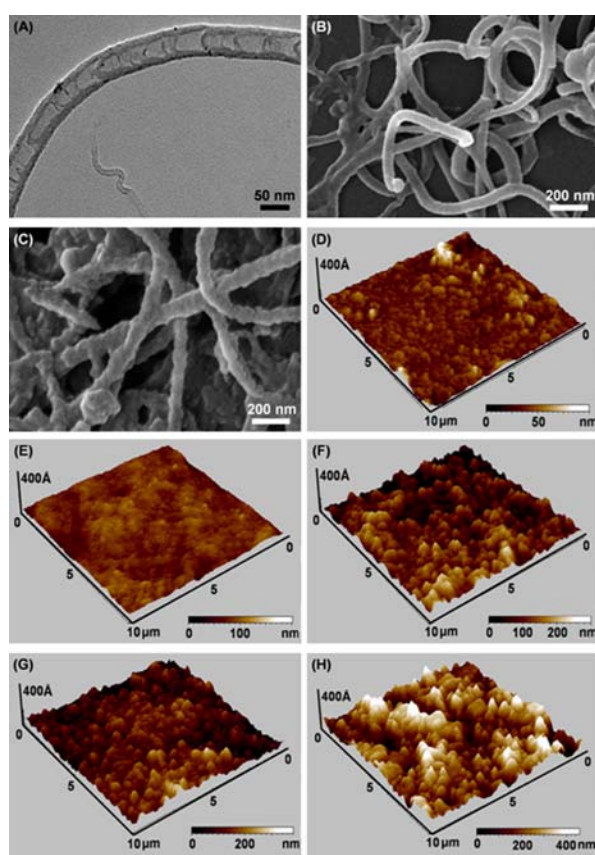

6  
7 **Fig. S3** TEM image of (A) NCNTs, SEM images of (B) PNCNTs and (C) Ab<sub>2</sub>-PNCNTs, and  
8 AFM images of (D) QDs, (E) QDs/chitosan, (F) QDs/Ab<sub>1</sub>, (G) QDs/Ab<sub>1</sub>/BSA and (H)  
9 QDs/Ab<sub>1</sub>/BSA/CEA.

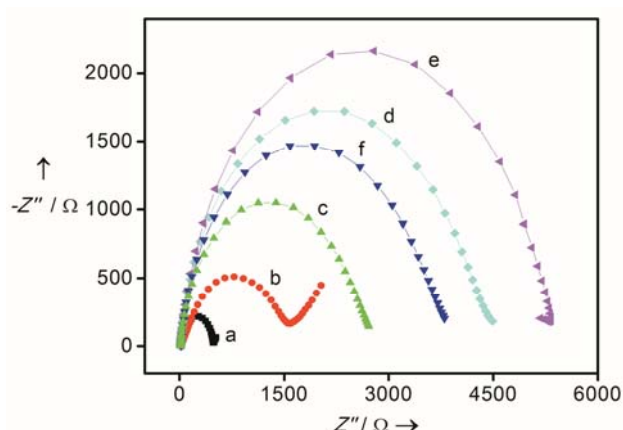

1  
2 **Fig. S4** EIS plots of bare GCE (a), GCE/QDs (b), GCE/QDs/Ab<sub>1</sub> (c), GCE/QDs/Ab<sub>1</sub>/BSA (d)  
3 GCE/QDs/Ab<sub>1</sub>/BSA/CEA (e) and GCE/QDs/Ab<sub>1</sub>/BSA/CEA/Ab<sub>2</sub>-PNCNTs (f).

#### 4 Optimization of conditions

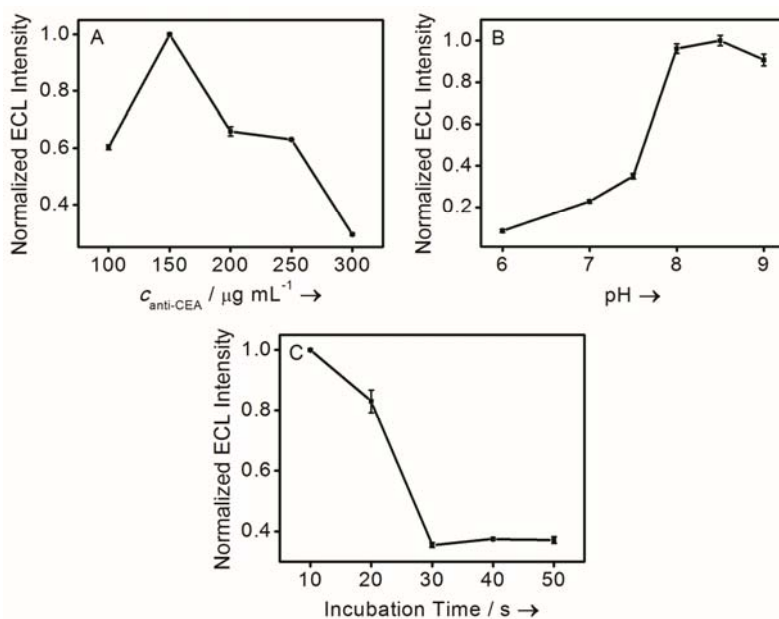

5  
6 **Fig. S5** Effects of (A) Ab<sub>2</sub> concentration used for preparation of Ab<sub>2</sub>-PNCNTs, (B) pH of  
7 detection and (C) incubation time for CEA on ECL intensity in air-saturated 0.1 M PBS. 150  $\mu\text{g}$   
8  $\text{mL}^{-1}$  Ab<sub>2</sub>, pH 8.0 PBS and 30 min for CEA capture are the optimal conditions.

#### 9 Stability and reproducibility



1 Both the intra-assay and inter-assay precisions of the ECL immunosensor were examined at 5  
2  $\text{ng mL}^{-1}$  CEA for five times. The relative standard deviations (RSD) were 4.5% and 6.6%,  
3 respectively, showing the good precision and acceptable fabrication reproducibility. Nine  
4 measurements of ECL emission upon continuous cyclic scans of the ECL immunosensor at 5  
5  $\text{ng mL}^{-1}$  CEA showed coincident signal with RSD of 0.81% (Fig. S6), indicating acceptable  
6 reliability and stability of the detection signal.

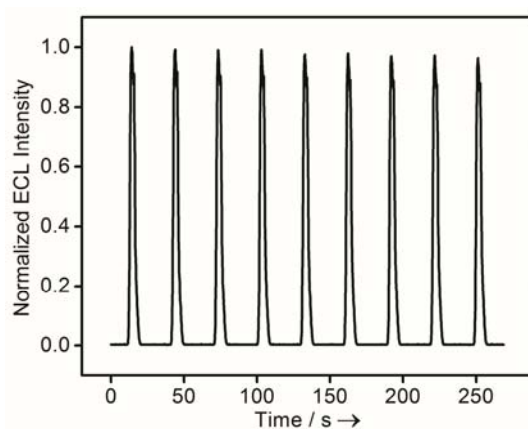

7  
8 **Fig. S6** Continuous cyclic scans of the immunosensor in the air-saturated detection solution after  
9 incubation with 5  $\text{ng mL}^{-1}$  of CEA and then  $\text{Ab}_2\text{-PNCNTs}$ .

10

1 **Table S1. Comparison of CEA determinations in human serum samples with the proposed**  
2 **immunosensor and turbidimetric immunoassay (in ng mL<sup>-1</sup>).**

| Sample         | proposed method | reference method | relative error (%) |
|----------------|-----------------|------------------|--------------------|
| 1 <sup>a</sup> | 12.77           | 12.45            | 2.57               |
| 1 <sup>b</sup> | 1.286           | 1.245            | 3.29               |
| 1 <sup>c</sup> | 0.112           | 0.125            | -9.96              |
| 2              | 5.74            | 5.32             | 7.89               |
| 3              | 3.17            | 2.98             | 6.38               |

### 3 **References**

- 4 S1. S. J. Jiang, Y. W. Ma, G. Q. Jian, H. S. Tao, X. Z. Wang, Y. N. Fan, Y. N. Lu, Z. Hu, Y.  
5 Chen, *Adv. Mater.* 2009, 21, 4953.
- 6 S2. Ding, S. N.; Xu J. J.; Chen, H. Y. *Chem. Commun.* **2006**, 42, 3631.
- 7 S3. Yu, W. W.; Qu, L. H.; Guo, W. Z.; Peng, X. G. *Chem. Mater.* 2003, 15, 2854.
- 8 S4. Y. C. Si and E. T. Samulski, *Nano Lett.* 2008, **8**, 1679–1682.
- 9 S5. S. Y. Wang, D. S. Yu and L. M. Dai *J. Am. Chem. Soc.* 2011, **133**, 5182–5183.
- 10 S6. (a) A. Magrez, S. Kasas, V. Salicio, N. Pasquier, J. W. Seo, M. Celio, S. Catsicas, B.  
11 Schwaller and L. Forró, *Nano Lett.* 2006, **6**, 1121–1125; (b) J. C. Carrero-Sánchez, A. L.  
12 Elías, R. Mancilla, G. Arrellín, H. Terrones, J. P. Laclette and M. Terrones, *Nano Lett.* 2006,

1           **8**, 1609–1616.

2   S7. (a) H. J. Burch, S. A. Contera, M. R. R. de Planque, N. Grobert and J. F. Ryan,

3           *Nanotechnology* 2008, **19**, 384001–384007; (b) H. J. Burch, E. Brown, S. A. Contera, N. C.

4           Toledo, D. C. Cox, N. Grobert, L. Hao, J. F. Ryan and J. A. Davies, *J. Phys. Chem. C* 2008,

5           **112**, 1908–1912.
